# Supplementary material for: Conserved Opposite Functions in Plant Resistance to Biotrophic and Necrotrophic Pathogens of the Immune Regulator SRFR1
Source: MDPI journal article supplement (doi:10.3390/ijms22126427), 2021-06-15
Supplement: s1 [file s1]

## Supplementary Materials

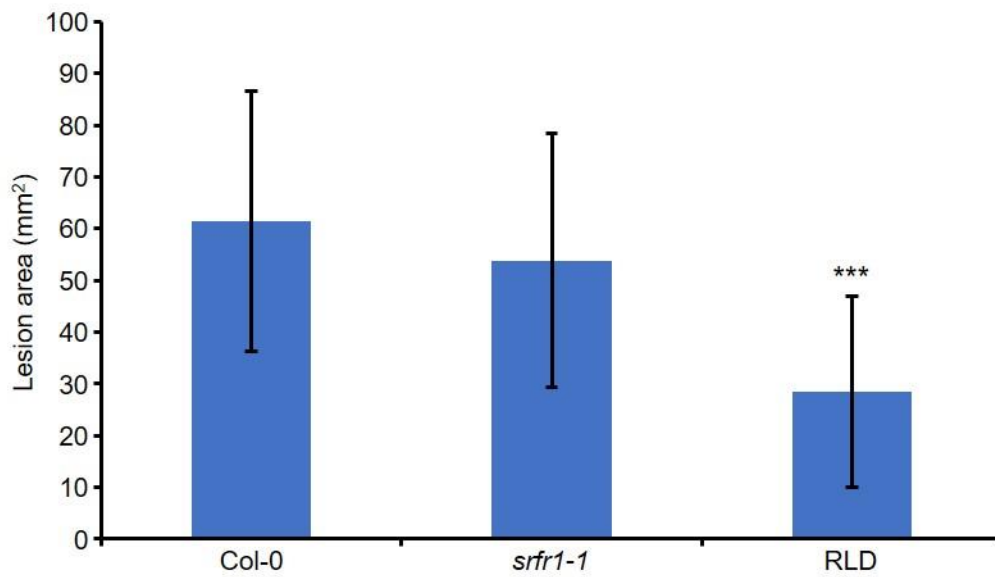

**Figure S1.** The *Arabidopsis srfr1-1* mutant displays increased susceptibility to a South African pepper isolate of *Botrytis cinerea*. Detached leaves from 4-week-old plants grown under a 16 h light/8 h dark cycle at 22 °C were inoculated at dawn with 10 µL of half-strength grape juice containing  $5 \times 10^4$  *B. cinerea* (pepper isolate) spores mL<sup>-1</sup> and lesion areas measured after 72 h using ImageJ. Data shown are mean lesion sizes  $\pm$  standard deviation from 48 (Col-0), 47 (*srfr1-1*) and 41 (RLD) detached leaves. Asterisks denote a significant difference of values for RLD compared to those for Col-0 and *srfr1-1* at \*\*\*  $p < 0.0001$  as determined by Tukey's HSD test.

|             |   |                                                                                                                            |   |      |
|-------------|---|----------------------------------------------------------------------------------------------------------------------------|---|------|
| Rice        | : | -----MGRRAELARWGGGRNMSKAIIRILDALHARSPTSIMHLCNRAFICYQLELHKHHVVKDCDRAILDLPAALQAYITKGRALSALGKKEEALINWQGYHVAVEHOSADLKQLELEEL   | : | 115  |
| Arabidopsis | : | MATAITATSERRELAKHOSGRNMSKAIIRVLDLSLAK-ESSILDICNRAFICYQLELHKHHVVKDCDRAILDLPAALQAYITKGRALSALGKKEEALINWQGYHVAVEHOSADLKQLELEEL | : | 119  |
| Tomato      | : | --MAKVTIDRELAKICSSKEWSKAIIRILDSLLAQ-TCVVIDICNRAFICYQLELHKHHVVKDCDRAILDLPAALQAYITKGRALSALGKKEEALINWQGYHVAVEHOSADLKQLELEEL   | : | 117  |
| Potato      | : | --MASTVTDRELAKICSSKEWSKAIIRILDSLLAQ-TCVVIDICNRAFICYQLELHKHHVVKDCDRAILDLPAALQAYITKGRALSALGKKEEALINWQGYHVAVEHOSADLKQLELEEL   | : | 117  |
| Pepper      | : | --MTKVTIDRELAKICSSKEWSKAIIRILDSLLAQ-TCVVIDICNRAFICYQLELHKHHVVKDCDRAILDLPAALQAYITKGRALSALGKKEEALINWQGYHVAVEHOSADLKQLELEEL   | : | 117  |
|             |   |                                                                                                                            |   |      |
| Rice        | : | VSSVTCICETICEELRVLDASPCDK-----VVSIDRVVDTSCTATMAITATTVVTEENICNSGVISNCAVILLANDN-----KADN                                     | : | 191  |
| Arabidopsis | : | IMDARRRIDGILKSATSPQETPA---YHSS--KSDP-----KSDKIDNHESSASSNGNSHESSEFGEOSKIVSPKSVASASKQSDGNSDLNCGSVYKPKENGKCGSITNGYYES         | : | 227  |
| Tomato      | : | LKIAKONTAVGSNNHVSQSSGPESNTGPIITST--KSGETODISKASDRFKTSSCGMLSESEKKNSSVVLONS-----SNNKSKHKKIHESSEK-----LEE-----RQANRTNN        | : | 217  |
| Potato      | : | LKIAKONTAVASNNHVSQSSGPESNTGPIITST--KSGETODISKASDRFKTSSCGMLSESEKKNSSVVLONS-----SNNKSKHKKIHESSEK-----LEE-----RQANRTNN        | : | 217  |
| Pepper      | : | LKIAKONTAPAVNDNLVSSSGPESNTGPIITSA--KSVETODISKASDRFKTSSCGMLSESEKKNSSVVLONS-----SKNAKHKKIKERKSDN-----FHE-----RQANRTNN        | : | 217  |
|             |   |                                                                                                                            |   |      |
| Rice        | : | NKECSSPTKDTTGHHTPKKTTTPDK-----KSKAKGRKINSOTETVAL-SSSGETVAVDTTLFASKISKSKSISLDFRLSRGIAQVNEGKYNAVAISIFDQITREPTTYPEALIG        | : | 303  |
| Arabidopsis | : | CPKCMG-----SDTHNLAE-----SDRFCEL--GINGNKISIKSSKSHAEACGCHSDPSRNNKYITARIS-CHSISVDFRLSRGIAQVNEGNYTPAISIFDQITREPTTYPEALIG       | : | 336  |
| Tomato      | : | CKKLGYPSLVCSRLSISEDSRKSSAVTSSESSESEFNDQITISQNNKCDVRVELSDGCKRNNKKFCVARVN-KTMSINVDFRLSRGIAQVNEGKYNAVAISIFDQITREPTTYPEALIG    | : | 336  |
| Potato      | : | YKKLGYPSPVCSRLSISEDSRKSSAVTSSESSESEFNDQITISQNNKCDVRVELSDGCKRNNKKFCVARVN-KTMSINVDFRLSRGIAQVNEGKYNAVAISIFDQITREPTTYPEALIG    | : | 336  |
| Pepper      | : | CKKVGYPSLVCSRLSISEDSRKSSAVTSSESSESEFNDQITISQNNKCDVRVELSDGCKRNNKKFCVARINSKTMSINVDFRLSRGIAQVNEGKYNAVAISIFDQITREPTTYPEALIG    | : | 337  |
|             |   |                                                                                                                            |   |      |
| Rice        | : | RGTAIAFORELDAISDFTKAIQSNPSAGEAWKRRGQARAALGESPVAIEDLTALKALEFPEDSDILHERGIVN--KTKDYNAAVEDLSICVKFKDNKNSAHTYGLGLSALGEYKRAED     | : | 421  |
| Arabidopsis | : | RGTAIAFORELESATDFTKAIQSNPSAGEAWKRRGQARAALGESPVAIEDLTALKALEFPEDSDILHERGIVN--KSKDPTAAVKOLSLCLKQKKNKSAHTYGLGLSALGEYKKAEE      | : | 454  |
| Tomato      | : | RGTAIAFORELDAISDFTKAIQSNPSAGEAWKRRGQARAALGESPVAIEDLTALKALEFPEDSDILHERGIVN--KTKDEKCAVEDLSICVKFKDNKNSAHTYGLGLSALGEYKRAEE     | : | 454  |
| Potato      | : | RGTAIAFORELDAISDFTKAIQSNPSAGEAWKRRGQARAALGESPVAIEDLTALKALEFPEDSDILHERGIVN--KTKDEKCAVEDLSICVKFKDNKNSAHTYGLGLSALGEYKRAEE     | : | 454  |
| Pepper      | : | RGTAIAFORELDAISDFTKAIQSNPSAGEAWKRRGQARAALGESPVAIEDLTALKALEFPEDSDILHERGIVNFKTKDEKCAVEDLSICVKFKDNKNSAHTYGLGLSALGEYKRAEE      | : | 457  |
|             |   |                                                                                                                            |   |      |
| Rice        | : | EHLLETKYDENFDISWAHLSGLYLDTCGPFERNMNEKVLQIDVSGKAYHLRGLVTHCMGRHRSNAIKDLSVAIKHESSTIECLYLRSCHYHAIGLYKBAVKDYSDLDLELDSMKKFVL     | : | 541  |
| Arabidopsis | : | EHLLETKYDSDNYLEAWHILAQFYODLANSEKALCECHLOLQIDVSNVVKAYHLRGLVTHCMGRHRSNAIKDLSVAIKHESSTIECLYLRSCHYHAIGLYKBAVKDYSDLDLELDSMKKFVL | : | 573  |
| Tomato      | : | EHKKAIOIERNFLEAWHILAQFYODLANSEKALCECHLOLQIDVSNVVKAYHLRGLLTHCMGHERNAIKDLSMGLSDSANIECLYLRSCHYHAIGLYKBAVKDYSDLDLELDSMKKFVL    | : | 574  |
| Potato      | : | EHKKAIOIERNFLEAWHILAQFYODLANSEKALCECHLOLQIDVSNVVKAYHLRGLLTHCMGHERNAIKDLSMGLSDSANIECLYLRSCHYHAIGLYKBAVKDYSDLDLELDSMKKFVL    | : | 574  |
| Pepper      | : | EHKKAIOIERNFLEAWHILAQFYODLANSEKALCECHLOLQIDVSNVVKAYHLRGLLTHCMGHERNAIKDLSMGLSDSANIECLYLRSCHYHAIGLYKBAVKDYSDLDLELDSMKKFVL    | : | 577  |
|             |   |                                                                                                                            |   |      |
| Rice        | : | OCLAFYQKEALYTASKINLRFSCFNIDLDVDPLFKFYWCKRLHPKNVCEKVYROPPIRLSLRSGRLNKQEKETKHQITLILADSDIGKTOYNCRCGFIPNRCQRMAGLAATEIAQKV      | : | 661  |
| Arabidopsis | : | OCLAFYQKEALYTASKYSEFELCFDIDDIDPMLFKFYWCKRLHPKNVCEKVYROPPIRLSLRSGRLNKQEKETKHQITLILADSDIGKTOYNCRCGFIPNRCQRMAGLAATEIAQKV      | : | 693  |
| Tomato      | : | OCLAFYQKEALYTASKYNSEFFSWFDIDIDIDPLFKFYWCKRLHPKNVCEKVYROPPIRLSLRSGRLNKQEKETKHQITLILADSDIGKTOYNCRCGFIPNRCQRMAGLAATEIAQKV     | : | 694  |
| Potato      | : | OCLAFYQKEALYTASKYNSEFFSWFDIDIDIDPLFKFYWCKRLHPKNVCEKVYROPPIRLSLRSGRLNKQEKETKHQITLILADSDIGKTOYNCRCGFIPNRCQRMAGLAATEIAQKV     | : | 694  |
| Pepper      | : | OCLAFYQKEALYTASKYNSEFFSWFDIDIDIDPLFKFYWCKRLHPKNVCEKVYROPPIRLSLRSGRLNKQEKETKHQITLILADSDIGKTOYNCRCGFIPNRCQRMAGLAATEIAQKV     | : | 697  |
|             |   |                                                                                                                            |   |      |
| Rice        | : | SKAWRTRNP-----KNNAKVRRRRKDNAC-ONRGG-YCSTSLSGSPTS-SPNEDRISGSISLWHDVYNVAVKWRQISEPCDPVVWINKLSEEFNSFGFSHTPMLLGQAKIIRY          | : | 770  |
| Arabidopsis | : | SKAWR--IEWRRSTKGTITNCKNNKRRRNINISLNRRGACGCTSSSSPTSTSYSLDDRSTGRSMMSWNHLYSLAVKWRQISEPCDPVVWINKLSEEFNTGFSHTPMLVGQAKVRY        | : | 810  |
| Tomato      | : | SKAWRAIQAEWRNSTKGITNCKSKRLRRRKKNISLNRRGACGCTSSSSPTSTSYSLDDRSTGRSMMSWNHLYSLAVKWRQISEPCDPVVWINKLSEEFNTGFSHTPMLVGQAKVRY       | : | 814  |
| Potato      | : | SKAWRAIQAEWRNSTKGITNCKSKRLRRRKKNISLNRRGACGCTSSSSPTSTSYSLDDRSTGRSMMSWNHLYSLAVKWRQISEPCDPVVWINKLSEEFNTGFSHTPMLVGQAKVRY       | : | 814  |
| Pepper      | : | SKAWRAIQAEWRNSTKGITNCKSKRLRRRKKNISLNRRGACGCTSSSSPTSTSYSLDDRSTGRSMMSWNHLYSLAVKWRQISEPCDPVVWINKLSEEFNTGFSHTPMLVGQAKVRY       | : | 817  |
|             |   |                                                                                                                            |   |      |
| Rice        | : | YBYKSVLEAAKNILMDLRYNNABDRAIELIDIEKIKKTEVASSCELELHIVGTEYVVSFRCDSINFGRRLEGTRITQ-NMCKTSFDFAIRTPCTPSRWEEYDEEMSAWEAICAY         | : | 889  |
| Arabidopsis | : | FPNFORILTIKAKITIDKLSVRSKOKVIDLSKDEKIKETNRAFTTDELENIVGETFWVATWCDSTSGSEGKRLGTRITQKBERGYDFAIRTPCTPSRWEEYDEEMSAWEALCAY         | : | 930  |
| Tomato      | : | FPNFORILTIKAKVIKENKSVCKNKEDRIIDLEPOOKIQETMAAESSDLIRVVGOFWLATWCNSALPEGKRLGTRITVW-KMGEGYDFAIRTPCTPSRWEEYDEEMSAWEALCAY        | : | 933  |
| Potato      | : | FPNFORILTIKAKVIKENKSVCKNKEDRIIDLEPOOKIQETMAAESSDLIRVVGOFWLATWCNSALPEGKRLGTRITVW-KMGEGYDFAIRTPCTPSRWEEYDEEMSAWEALCAY        | : | 933  |
| Pepper      | : | FPNFORILTIKAKVIKENKSVCKNKEDRIIDLEPOOKIQETMAAESSDLIRVVGOFWLATWCNSALPEGKRLGTRITVW-KMGEGYDFAIRTPCTPSRWEEYDEEMSAWEALCAY        | : | 936  |
|             |   |                                                                                                                            |   |      |
| Rice        | : | CSDTNPRFEDMDIAVKAAILRMITYYWNFMPLRGTAVGFIVLLGLLAAANMEYTSIPKGLQVDWEAILEDPSFVDVSKWLYPSLKIGTSWKNKPDVTSFTTGSVVAALSTY            | : | 1009 |
| Arabidopsis | : | CEENYGSFDDFVLETVRDAILRMITYYWNFMPLRGTAVGFIVLLGLLAAANMEYTSIPKGLQVDWEAILEDPSFVDVSKWLYPSLKIGTSWKNKPDVTSFTTGSVVAALSTY           | : | 1050 |
| Tomato      | : | CEENYGSFDDFVLETVRDAILRMITYYWNFMPLRGTAVGFIVLLGLLAAANMEYTSIPKGLQVDWEAILEDPSFVDVSKWLYPSLKIGTSWKNKPDVTSFTTGSVVAALSTY           | : | 1053 |
| Potato      | : | CEENYGSFDDFVLETVRDAILRMITYYWNFMPLRGTAVGFIVLLGLLAAANMEYTSIPKGLQVDWEAILEDPSFVDVSKWLYPSLKIGTSWKNKPDVTSFTTGSVVAALSTY           | : | 1053 |
| Pepper      | : | CEENYGSFDDFVLETVRDAILRMITYYWNFMPLRGTAVGFIVLLGLLAAANMEYTSIPKGLQVDWEAILEDPSFVDVSKWLYPSLKIGTSWKNKPDVTSFTTGSVVAALSTY           | : | 1056 |
|             |   |                                                                                                                            |   |      |
| Rice        | : | DT : 1011                                                                                                                  | : |      |
| Arabidopsis | : | ND : 1052                                                                                                                  | : |      |
| Tomato      | : | SD : 1055                                                                                                                  | : |      |
| Potato      | : | SD : 1055                                                                                                                  | : |      |
| Pepper      | : | SD : 1058                                                                                                                  | : |      |

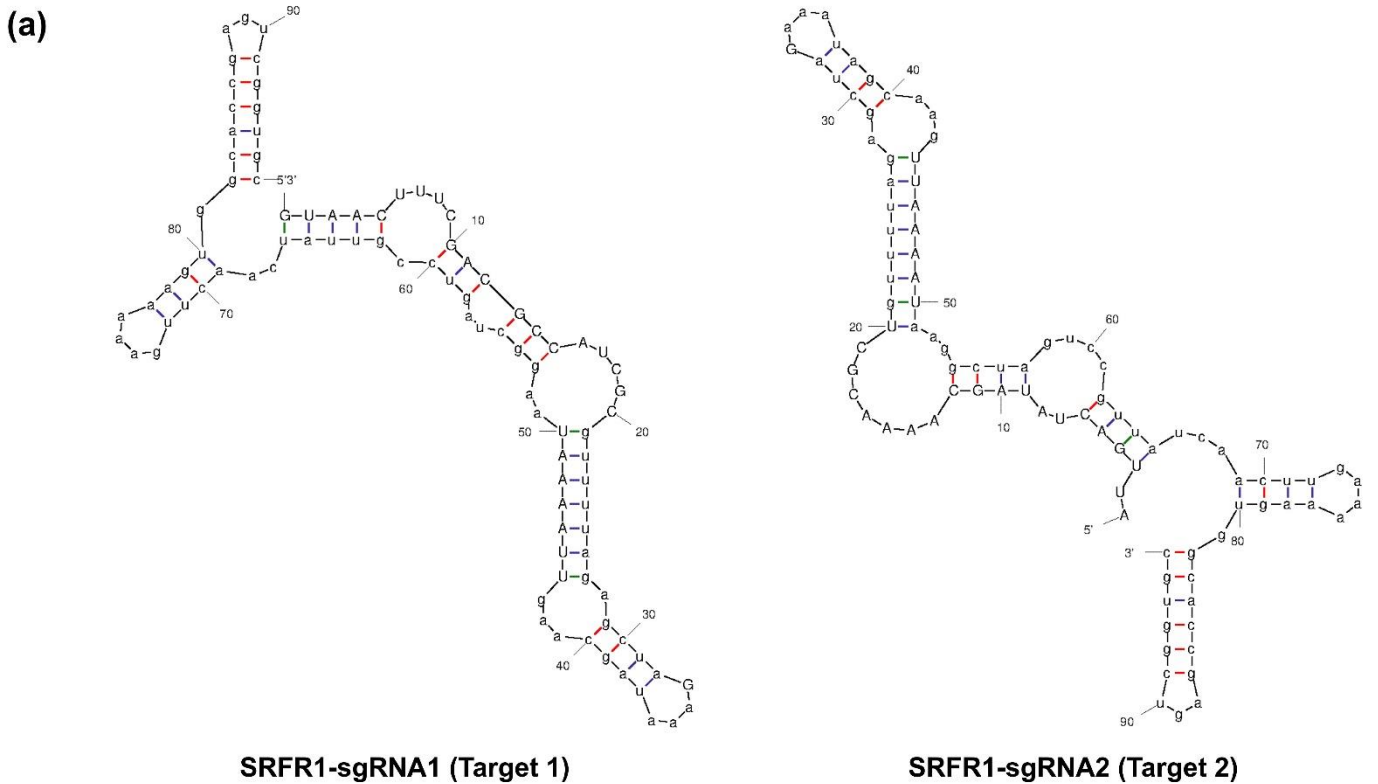

(b)

| sgRNA        | TSL (3) | GSL (0) | CBP (>7) | TBP (>12) | IBP (>6) | GC (30-80%) |
|--------------|---------|---------|----------|-----------|----------|-------------|
| SRFR1-sgRNA1 | 3       | 0       | 5        | 11        | 0        | 55          |
| SRFR1-sgRNA2 | 3       | 0       | 4        | 9         | 0        | 35          |

**Figure S3.** Secondary structures of sgRNAs predicted using Mfold online server. (a) Target sgRNA secondary structure; (b) Parameters calculated from the predicted secondary structures of sgRNAs. TSL: total stem-loop; GSL: Stem-loop in the guide sequence; CBP: consecutive base pair (guide sequence and the other sequence); TBP: total base pairs in guide sequence with other sequences; IBP: internal base pairs in sgRNA; GC content (%) of sgRNA. Further details about the criteria available on the webpage of the CRISPR-P 2.0 tool (<http://crispr.hzau.edu.cn/CRISPR2/>).

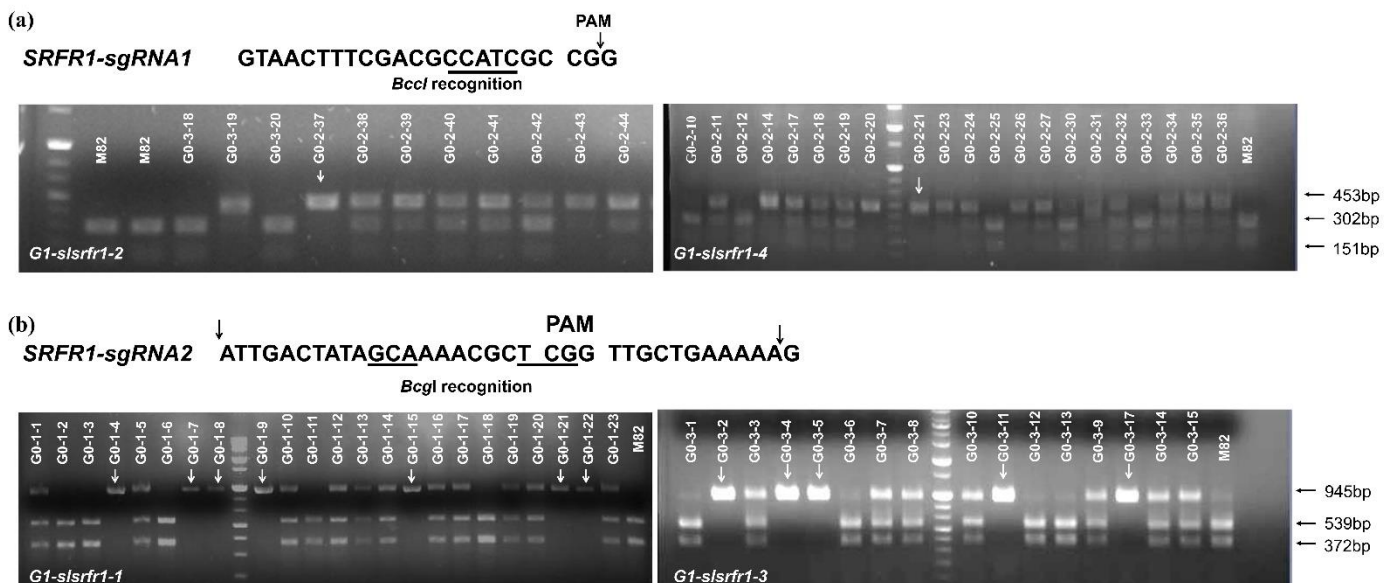





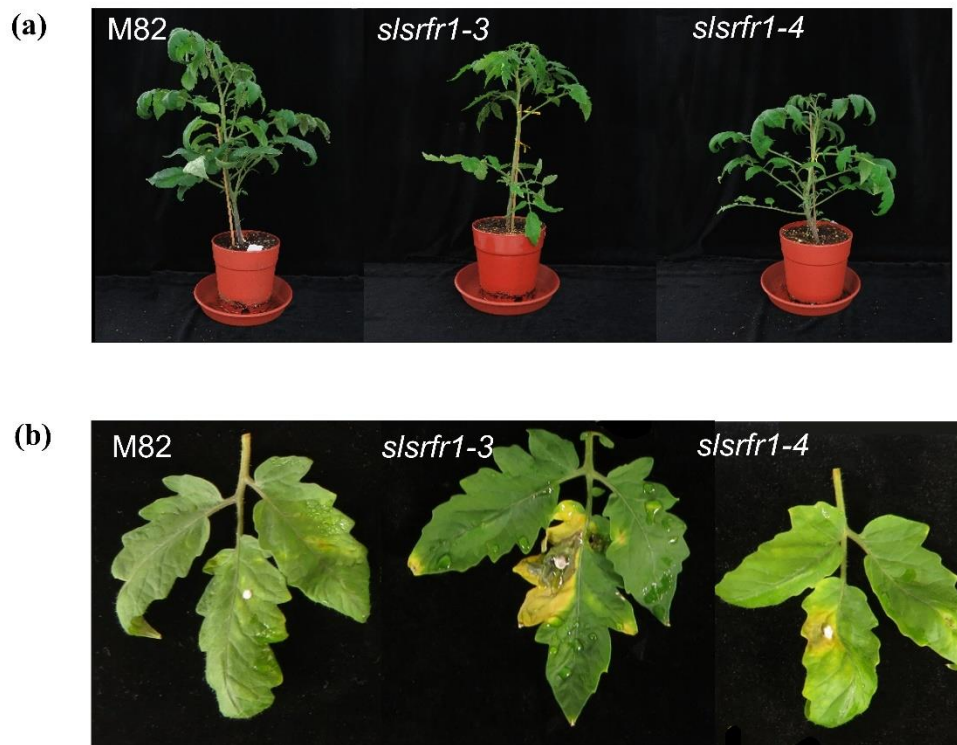

**Figure S7.** Plant response to *Fusarium oxysporum* f. sp. *lycopersici* in *SISRFR1* alleles. (a) Morphology of 6-week-old M82, *slsrfr1-3* and *slsrfr1-4* grown at 25 °C in 16 h light/8 h dark long-day photo-period; (b) Detached leaves from 6-week-old M82, *slsrfr1-3*, and *slsrfr1-4* were inoculated with 4 mm-diameter plugs of *F. oxysporum*. Photographs were taken at 8 DPI.

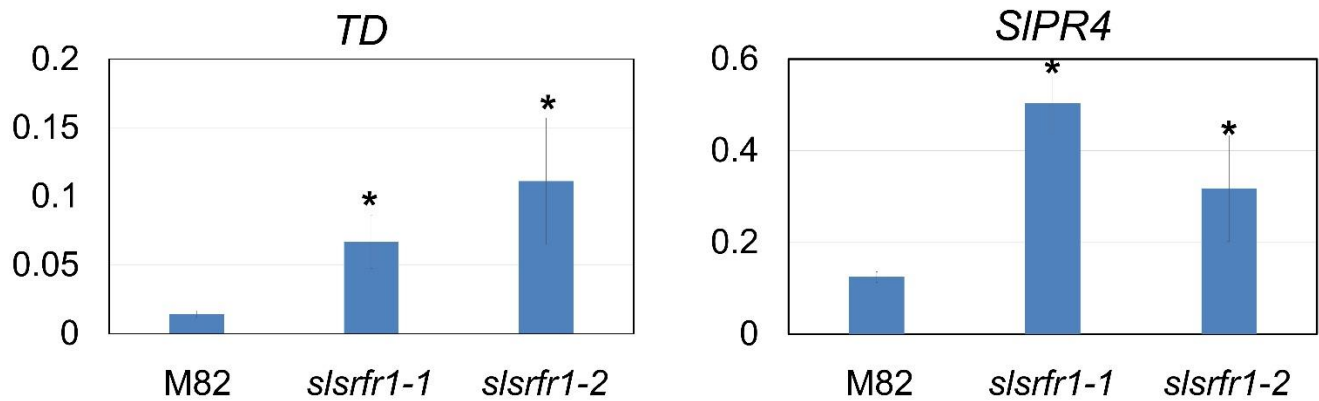

**Figure S8.** Expression of JA-responsive genes in CRISPR/Cas9-edited *slsrfr1* plants. The genes used for gene expression analysis refer to *TD* (*Solyc09g008670.2*) and *SIPR4* (*Solyc01g097240.2*). Gene expression levels of each gene were normalized with *SIACT* (*Solyc04g011500.3.1*) as an internal control. Error bars represent standard deviation. A statistically significant difference was determined by the Student's t-test (\*  $p < 0.05$ ).

**Table S1.** Genome editing contribution in *slsrfr1* G0 plants.

| No. | G0 alleles | Indel frequency | Homozygote G1 plants identified from CAPS analysis | G1 alleles       | Positon of editing | Type of event | Homozygote alleles/total analyzed lines |
|-----|------------|-----------------|----------------------------------------------------|------------------|--------------------|---------------|-----------------------------------------|
| 1   | G0-1       | 60%             | G0-1-4,7,8,9,15,21,22,40,41,44,54                  | <i>slsrfr1-1</i> | sgRNA2             | -11 nt        | 11/57                                   |
| 2   | G0-2       | 1%              | G0-2-37                                            | <i>slsrfr1-2</i> | sgRNA1             | -1nt/-4nt     | 1/44                                    |
| 3   | G0-3       | 44%             | G0-3-2,4,5,11,17                                   | <i>slsrfr1-3</i> | sgRNA2             | +1 nt         | 5/20                                    |
| 4   | G0-2       | 1%              | G0-2-21                                            | <i>slsrfr1-4</i> | sgRNA1             | -32nt/-4nt    | 1/44                                    |

**Table S2.** Off-targeted data in all *SlSRFR1* alleles.

| No. | off target candidates | Indel (%)    |              |              |              |              |              |
|-----|-----------------------|--------------|--------------|--------------|--------------|--------------|--------------|
|     | Alleles               | sgRNA1-OFF_1 | sgRNA1-OFF_2 | sgRNA2-OFF_1 | sgRNA2-OFF_2 | sgRNA2-OFF_3 | sgRNA2-OFF_4 |
| 1   | <i>slsrfr1-1</i>      | 0            | 0            | 0            | 0            | 0            | 0            |
| 2   | <i>slsrfr1-2</i>      | 0            | 0            | 0            | 0            | 0            | 0            |
| 3   | <i>slsrfr1-3</i>      | 0            | 0            | Failed       | 0            | 0            | 0            |
| 4   | <i>slsrfr1-4</i>      | 0            | 0            | 0            | 0            | 0            | 0            |

**Table S3.** The *SRFR1* single guide RNA and target sequences used in the study.

| No. | Name   | gRNAs                 | Target position on genome | Number of off-targets (<4 MMs) |
|-----|--------|-----------------------|---------------------------|--------------------------------|
| 1   | sgRNA1 | GTAAC TTTCGACGCCATCGC | 5'UTR and CDS             | 1                              |
| 2   | sgRNA2 | ATTGACTATAGCAAAACGCT  | CDS                       | 3                              |

**Table S4.** Potential off-targets of single guide RNAs used in this study.

| Potential off-target sequence                     | Number of mismatch | Locus               | Gene                  | Region     |
|---------------------------------------------------|--------------------|---------------------|-----------------------|------------|
| sgRNA1 :<br>GTAAC <b>TTTCG</b> AAAA <b>CATCGC</b> |                    |                     |                       |            |
| GTAAC <b>CTTCGAAGTC</b> ATCGA                     | 4                  | SL3.0ch08:-31939614 |                       | Intergenic |
| GTAAC <b>TTTC</b> AAGGCCATCGA                     | 3                  | SL3.0ch05:+48464484 |                       | Intergenic |
| GAAACT <b>TTTCG</b> AAAA <b>CATCGC</b>            | 4                  | SL3.0ch08:+55060271 |                       | Intergenic |
| GTGA <b>ATATCGACGCC</b> ATCGA                     | 4                  | SL3.0ch01:+65466561 |                       | Intergenic |
| GAAACT <b>TTTCGACCTCATAGC</b>                     | 4                  | SL3.0ch07:+66595791 |                       | Intergenic |
| GTAAC <b>TTTCGAAGGCTTTGC</b>                      | 4                  | SL3.0ch02:+35442157 | gene:Solyc02g062950.3 | CDS        |
| sgRNA2 :<br>ATTGACTATAGCAAAA <b>ACGCT</b>         |                    |                     |                       |            |
| ATTGACTAA <b>ACAAAAAACT</b>                       | 4                  | SL3.0ch05:+5657976  |                       | Intergenic |
| AATGA <b>ATATAG</b> AAAA <b>AGCT</b>              | 4                  | SL3.0ch01:-65718384 |                       | Intergenic |
| ATTGA <b>ATATAG</b> CAAAA <b>TGTT</b>             | 3                  | SL3.0ch03:+67920252 |                       | Intergenic |
| ATTGAT <b>TATAGT</b> AAAA <b>ACACA</b>            | 4                  | SL3.0ch12:+66227955 | gene:Solyc12g096230.2 | utr        |
| ATT <b>TACTA</b> CAGCAAAA <b>CACT</b>             | 4                  | SL3.0ch04:-39705061 | gene:Solyc04g049130.3 | intron     |
| <b>T</b> TAGACTATAGCA <b>AT</b> ACT               | 4                  | SL3.0ch09:-48437258 |                       | Intergenic |
| <b>T</b> TAGACTATAGCA <b>AT</b> ACT               | 4                  | SL3.0ch10:-22995255 |                       | Intergenic |
| ATTGACTATAGCA <b>CAAAAAT</b>                      | 4                  | SL3.0ch10:+12194723 |                       | Intergenic |
| <b>TTT</b> GACTATAGAA <b>ACAAGCT</b>              | 4                  | SL3.0ch04:+62510472 |                       | Intergenic |
| AT <b>GG</b> ACTATAGCAAAA <b>AAAT</b>             | 4                  | SL3.0ch06:+3388631  |                       | Intergenic |
| ATTGA <b>ATATACT</b> AAAC <b>CCCT</b>             | 4                  | SL3.0ch11:+36073500 |                       | Intergenic |
| ATTGAC <b>AATAACA</b> AAA <b>GGCT</b>             | 3                  | SL3.0ch09:-46995239 |                       | Intergenic |
| ATTGACTATAGAA <b>AAAGTTT</b>                      | 4                  | SL3.0ch11:+13491883 |                       | Intergenic |
| ATT <b>TAGTA</b> AAGCAAAA <b>GGCT</b>             | 4                  | SL3.0ch04:+7910625  |                       | Intergenic |
| <b>GTT</b> GACTATAGCAAAA <b>ACGAC</b>             | 3                  | SL3.0ch10:+17248976 |                       | Intergenic |
| ATTGACT <b>CTAGCG</b> AAA <b>GGAT</b>             | 4                  | SL3.0ch07:+13077343 |                       | Intergenic |
| ATTGACTAT <b>TGCCAACCTCT</b>                      | 4                  | SL3.0ch12:-62098880 |                       | Intergenic |
| ATTGACTAT <b>TCCCAATCGCT</b>                      | 4                  | SL3.0ch07:-36501993 |                       | Intergenic |
| A <b>GT</b> GACTATACCAAA <b>TTGCT</b>             | 4                  | SL3.0ch00:-19086437 | gene:Solyc00g247300.3 | CDS        |
| A <b>GT</b> GACTATACCAAA <b>TTGCT</b>             | 4                  | SL3.0ch04:+52095679 | gene:Solyc04g054257.1 | CDS        |

The mismatched sequences are indicated by red

**Table S5.** Primers used in the off-target analysis.

| Name           | Sequences (5'→3')              | Guide RNA                                         | Potential off-target sequences        |
|----------------|--------------------------------|---------------------------------------------------|---------------------------------------|
| sgRNA1-OFF-1-F | GTCGTCGAATGCCTCCATCAGTC        | sgRNA1 :<br>GTAAC <b>TTTCG</b> AAAA <b>CATCGC</b> | GTAAC <b>CTTCGAAGTC</b> ATCGA         |
| sgRNA1-OFF-1-R | GTTATTCACGAGTGGCGAGCAC         |                                                   |                                       |
| sgRNA1-OFF-2-F | GTAGCTCCAGCACCATAATAAGCC       |                                                   | GTAAC <b>TTTCGAAGGCTTTGC</b>          |
| sgRNA1-OFF-2-R | CAAGAAAAAGTCCTCGCCGC           |                                                   |                                       |
| sgRNA2-OFF_1-F | ATCGTATTCAACATTAGCCTTACTGAGAAG | sgRNA2 :<br>ATTGACTATAGCAAAA <b>ACGCT</b>         | ATTGA <b>ATATAG</b> CAAAA <b>TGTT</b> |
| sgRNA2-OFF_1-R | AATTGCACAGGGAGGGGAAAC          |                                                   |                                       |
| sgRNA2-OFF_2-F | TGGTAAAGAGCCTCACATGATGACC      |                                                   | <b>GTT</b> GACTATAGCAAAA <b>ACGAC</b> |
| sgRNA2-OFF_2-R | GTCTATGGGCTTGTAAGACCATTG       |                                                   |                                       |
| sgRNA2-OFF_3-F | CGGATGCCCTAGTTCAAGGTG          |                                                   | ATT <b>TACTA</b> CAGCAAAA <b>CACT</b> |
| sgRNA2-OFF_3-R | GGAGAGATTCAATGACACTAAGAAGCTG   |                                                   |                                       |
| sgRNA2-OFF_4-F | TTTCCAAAATCAGTTGTGTTGTAGCC     |                                                   | A <b>GT</b> GACTATACCAAA <b>TTGCT</b> |
| sgRNA2-OFF_4-R | GACGCCGATAAGTTTATGCCAGAG       |                                                   |                                       |

**Table S6.** Primers used in this study.

| No. | Name               | Sequence (5'-3')                                                                        | Purpose            |
|-----|--------------------|-----------------------------------------------------------------------------------------|--------------------|
| 1   | SISRFR1-F1         | CGGTCAATAAAACACGTGTC                                                                    | Genotyping         |
| 2   | SISRFR1-R2         | GAGCTTCATCCTACTCCTCG                                                                    | Genotyping         |
| 3   | SISRFR1BccI-R      | GGAACAGTGAAAAACGTAAC                                                                    | Genotyping         |
| 4   | SISRFR1-MiSeq-1-F2 | ACACTCTTTCCCTACACGACGCTCTTCCGATCTAATCGCATCAATTGAGCTGC                                   | MiSeq              |
| 5   | SISRFR1-MiSeq-1-R2 | GTGACTGGAGTTCAGACGTGTGCTCTTCCGATCTATGACGCAAGTTTGAGCAAG                                  | MiSeq              |
| 6   | SISRFR1-MiSeq-2-F2 | ACACTCTTTCCCTACACGACGCTCTTCCGATCTTTGGACATTTATGAATGA                                     | MiSeq              |
| 7   | SISRFR1-MiSeq-2-R2 | GTGACTGGAGTTCAGACGTGTGCTCTTCCGATCTTAGGATCGAGCTGAAGTGCC                                  | MiSeq              |
| 8   | crU6C9-F1          | CAGTCGGTCTCAGGAGTGATCAAAAGTCCCACATCGATCAGGTGATATATAGCAGCTTAGTTTA                        | SgRNA construction |
| 9   | crU6C9-R1          | CAGTCGGTCTCACAATCGCTATGTCGACTCTATCATTATATAAACTAAGCTGCTATATATCACC                        | SgRNA construction |
| 10  | 9gR-SISRFR1-g5-F1  | CAGTCGGTCTCAATTGGTAACTTTTCGACGCCATCGCGTTTTAGAGCTAGAAATAGCAAGTTAAAATAAGGCTAGTCCGTTATCAAC | SgRNA construction |
| 11  | 9gR-R1             | CAGTCGGTCTCAAGCGAAAAAAGCACCAGCTCGGTGCCACTTTTTCAAGTTGATAACGGACTAGCCTTATTTT               | SgRNA construction |
| 12  | 9gR-SISRFR1-g10-F1 | CAGTCGGTCTCAATTGGATTGACTATAGCAAAACGCTGTTTTAGAGCTAGAAATAGCAAGTTAAAATAAGGCTAGTCCGTTATCAAC | SgRNA construction |
| 13  | SIPR1-qRT-F        | GCCATATTTCACTCTTGTGAG                                                                   | qRT-PCR            |
| 14  | SIPR1-qRT-R        | TAGTCTGGCCTCTCGGACA                                                                     | qRT-PCR            |
| 15  | SIPR2-qRT-F        | TCCAGGTAGAGACAGTGGTAAA                                                                  | qRT-PCR            |
| 16  | SIPR2-qRT-R        | CTGGTTTCTTTGGTGTTCTGC                                                                   | qRT-PCR            |
| 17  | SIPR5-qRT-F        | GCAACAACGTGCCATACACC                                                                    | qRT-PCR            |
| 18  | SIPR5-qRT-R        | AGACTCCACCACAATCACC                                                                     | qRT-PCR            |
| 19  | TomloxD-qRT-F      | GACAAGCAATAGCAGGAGTG                                                                    | qRT-PCR            |
| 20  | TomloxD-qRT-R      | TAAGTGTGCCAACATCAGAC                                                                    | qRT-PCR            |
| 21  | SIACT-qRT-F        | GAAATAGCATAAGATGGCAGACG                                                                 | qRT-PCR            |
| 22  | SIACT-qRT-R        | ATACCCACCATCACACCAGTAT                                                                  | qRT-PCR            |
| 23  | SIGAPDH-qRT-F      | CTGCTCTCTCAGTAGCCAACAC                                                                  | qRT-PCR            |
| 24  | SIGAPDH-qRT-R      | CTTCCTCCAATAGCAGAGGTTT                                                                  | qRT-PCR            |
| 25  | TD-qRT-F           | AGCTCAAACACACGCGCTGGA                                                                   | qRT-PCR            |
| 26  | TD-qRT-R           | AACCCCCACCACCAACAGGT                                                                    | qRT-PCR            |
| 27  | SIPR4-qRT-F        | CGATCTAAATTGATTTCATAGTACG                                                               | qRT-PCR            |
| 28  | SIPR4-qRT-R        | TCGTGAAGGATATACAAAATACA                                                                 | qRT-PCR            |
